# Supplementary material for: More Than Expected From Old Sponge Samples: A Natural Sampler DNA Metabarcoding Assessment of Marine Fish Diversity in Nha Trang Bay (Vietnam)
Source: Frontiers journal article supplement (doi:10.3389/fmars.2020.605148), 2020-12-09
Supplement: Image_4.pdf [file Image_4.pdf]

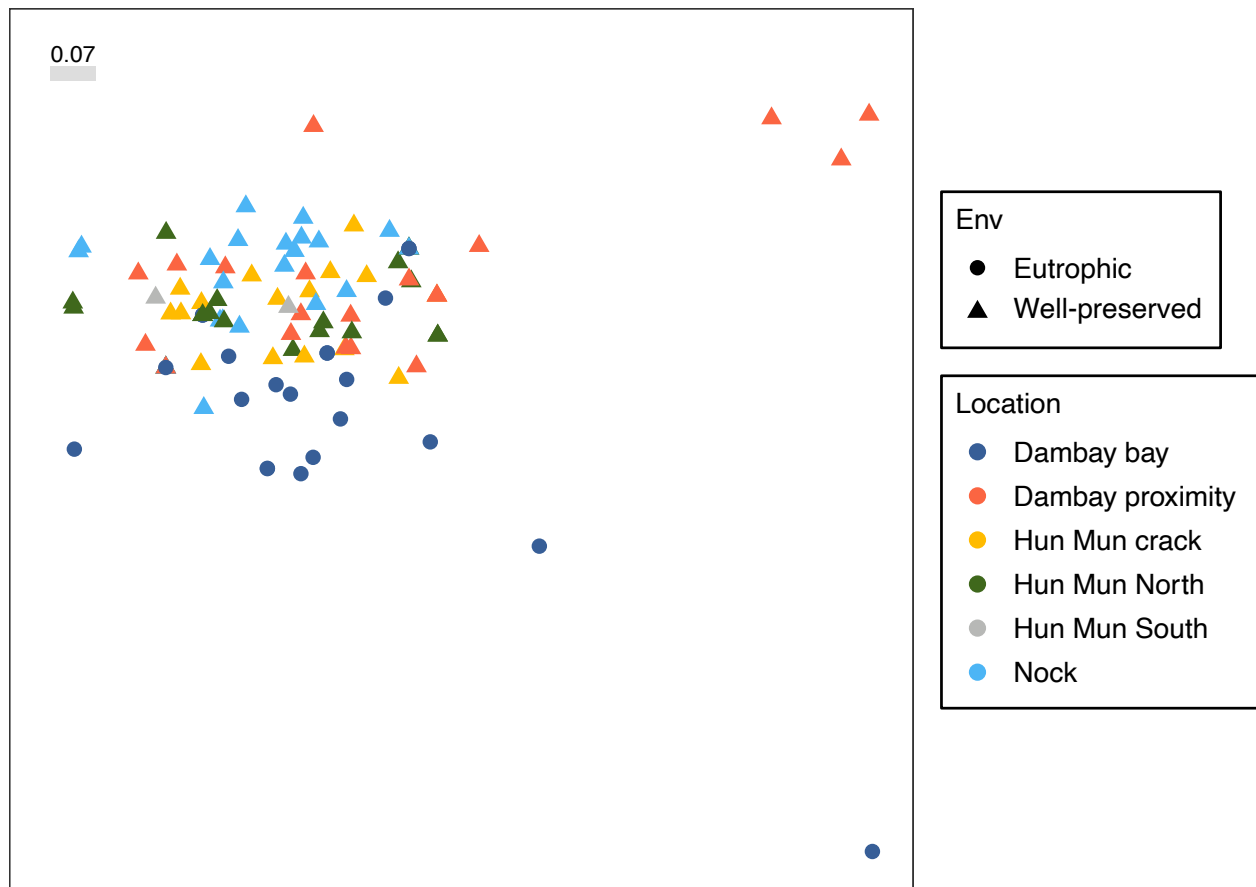

**Supplementary Figure S4.** Non-metric multidimensional scaling (nMDS) ordination of fish communities obtained from sponge nsDNA based on Bray-Curtis distances. Colors show differences between locations. Each environment is represented by a different shape.
